# Supplementary material for: A PdPt nanoparticle-decorated thiol-functionalized MOF with high peroxidase-like activity for colorimetric sensing of d-glucose and chlorophenol isomers
Source: Royal Society of Chemistry journal article supplement (doi:10.1039/d3tb00679d), 2023-01-01
Supplement: d3tb00679d1.pdf [file d3tb00679d1.pdf]

## 25 Contents List

- 26 1. Reagents and materials (S1)
- 27 2. Instrumentation and characterization (S2)
- 28 3. XRD patterns and FT-IR spectra of UiO-66-(SH)<sub>2</sub> and UiO-66-(SH)<sub>2</sub>@Pd<sub>m</sub>Pt<sub>n</sub> (Fig.  
29 S1)
- 30 4. XPS spectra of UiO-66-(SH)<sub>2</sub> and UiO-66-(SH)<sub>2</sub>@Pd<sub>m</sub>Pt<sub>n</sub> (Fig. S2)
- 31 5. Energy dispersive X-ray analysis of UiO-66-(SH)<sub>2</sub>@Pd<sub>2</sub>Pt<sub>1</sub> (Fig. S3)
- 32 6. High resolution XPS spectra of UiO-66-(SH)<sub>2</sub>@Pd<sub>2</sub>Pt<sub>1</sub> (Fig. S4)
- 33 7. Zeta potentials of UiO-66-(SH)<sub>2</sub>@Pd<sub>2</sub>Pt<sub>1</sub> under different conditions (Fig. S5)
- 34 8. Experimental condition optimization for TMB oxidation (S3 and Fig. S6)
- 35 9. Catalytic mechanism of UiO-66-(SH)<sub>2</sub>@PdPt (Fig. S7)
- 36 10. Experimental condition optimization for the oxidative coupling reaction of 2-CP  
37 and 4-AAP (S4 and Fig. S8)
- 38 11. PCA score maps of response modes for three CP isomers with different  
39 concentrations (Fig. S9)
- 40 12. PCA score maps of response modes for six DCP isomers with different  
41 concentrations (Fig. S10)
- 42 13. Color response of UiO-66-(SH)<sub>2</sub>@PdPt + H<sub>2</sub>O<sub>2</sub> + 4-AAP system in the presence  
43 of CPs (Fig. S11)
- 44 14. Kinetic parameters of catalytic reaction between different nanozymes and HRP  
45 (Table S1)
- 46 15. The performance of the nanozyme for glucose colorimetric detection (Table S2)
- 47 16. Determination of D-glucose concentration in human serum (Table S3)
- 48 17. The performance of different methods for the detection of 2-CP or 2,4- DCP  
49 (Table S4)
- 50 18. Determination of 2-CP and 2,4- DCP in spiked samples (Table S5)
- 51 19. Reference
- 52
- 53
- 54

## 55 **S1. Reagents and materials**

56 2,5-dimercapto-1,4-benzenedicarboxylic acid (DMBD) was purchased from  
57 Yanshen Technology Co., Ltd. (JiLin, China). Pd(OAc)<sub>2</sub>, Na<sub>2</sub>HPO<sub>4</sub>, NaH<sub>2</sub>PO<sub>4</sub>,  
58 K<sub>2</sub>HPO<sub>4</sub>, KH<sub>2</sub>PO<sub>4</sub>, 2-chlorophenol (2-CP), 4-chlorophenol (4-CP), 2,4-dichlorophenol  
59 (2,4-DCP), 2,5-dichlorophenol (2,5-DCP), and 3,5-dichlorophenol (3,5-DCP), NaBH<sub>4</sub>,  
60 2,2,6,6-tetramethylpiperidine (TEMP), 5,5-dimethyl-1-pyrroline-N-oxide (DMPO)  
61 were purchased from Aladdin Industrial Inc. (Shanghai, China). H<sub>2</sub>O<sub>2</sub> (30 wt%),  
62 thiourea, and chloroplatinic acid hydrate (H<sub>2</sub>PtCl<sub>6</sub>·6H<sub>2</sub>O) were purchased from  
63 Sinopharm Chemical Reagent Co., Ltd. (Shanghai, China). ZrCl<sub>4</sub>, *p*-benzoquinone, 3,4-  
64 dichlorophenol (3,4-DCP), 2,6-dichlorophenol (2,6-DCP), and 2,3-dichlorophenol  
65 (2,3-DCP) were purchased from Macklin Biochemical Co., Ltd. (Shanghai, China). 4-  
66 Aminoantipyrine (4-AAP), glucose oxidase (GOx), L-histidine, maltose, sucrose,  
67 lactose, fructose, and D-mannose were purchased from Yuanye Biotechnology Co.,  
68 Ltd. (Shanghai, China). 3-chlorophenol (3-CP) was purchased from J&K chemicals  
69 (Beijing, China). D-glucose and L-glucose were purchased from Shanghai ZZBIO CO.,  
70 Ltd. (Shanghai, China). Deionized water was prepared by a Milli-Q water purification  
71 system (Millipore, Billerica, MA, USA). All chemicals were analytical grade and  
72 above.

## 73 **S2. Instrumentation and characterization**

74 The morphologies and microstructures of the products were characterized by  
75 scanning electron microscopy (SEM), transmission electron microscopy (TEM) and  
76 high-resolution TEM (HRTEM). SEM images were recorded on Hitachi SU8010

77 (Japan). TEM images were taken with a Hitachi HT7700 (Japan) at an acceleration  
78 voltage of 100 kV. HRTEM images, selected area electron diffraction (SAED) pattern,  
79 scanning transmission electron microscopy (STEM), and dispersive X-ray analysis for  
80 elemental mapping (STEM-EDX) were collected on a Jeol JEM-2100F microscope  
81 (Japan). The XRD patterns determined by a powder X-ray diffraction (XRD) systems  
82 (Rigaku D/Max-2550pc) using Cu K $\alpha$  radiation ( $\lambda = 0.1541$  nm) at 40 kV and 250 mA  
83 in the  $2\theta$  ranging from  $3^\circ$  to  $100^\circ$  in steps of  $0.02^\circ$ . The X-ray photoelectron  
84 spectroscopy (XPS) measurements were carried out on an ESCALAB 250Xi  
85 spectrometer (Thermo Scientific, USA) equipped with a monochromatized Al K $\alpha$  X-  
86 ray source. Zeta potential values were measured using the Zetasizer Nano-ZS (Malvern  
87 Instruments Ltd.) at  $25^\circ\text{C}$ . Fourier transform infrared (FTIR) spectra were recorded  
88 from KBr pellets in the range of  $4000\text{--}400\text{ cm}^{-1}$  on a Nicolet iS10 spectrometer  
89 (Thermo Fisher Scientific, USA). The absorption spectra were recorded on a UV-1800  
90 Ultraviolet-Visible (UV-Vis) spectrophotometer (Shimadzu, Tokyo, Japan) equipped  
91 with a 1 cm quartz cuvette (1.05 mL). The electron paramagnetic resonance (EPR)  
92 spectrum was measured using an A300 EPR spectrometer (Bruker, Germany). The  
93 commercial glucometer used was the Yuwell 580 glucometer. The pH measurements  
94 were carried out using a Metrohm pH-meter (model 780) with a combined pH glass  
95 electrode, calibrated against standard buffer solution with pH values of 4.01, 6.86, and  
96 9.18 at  $25^\circ\text{C}$ .

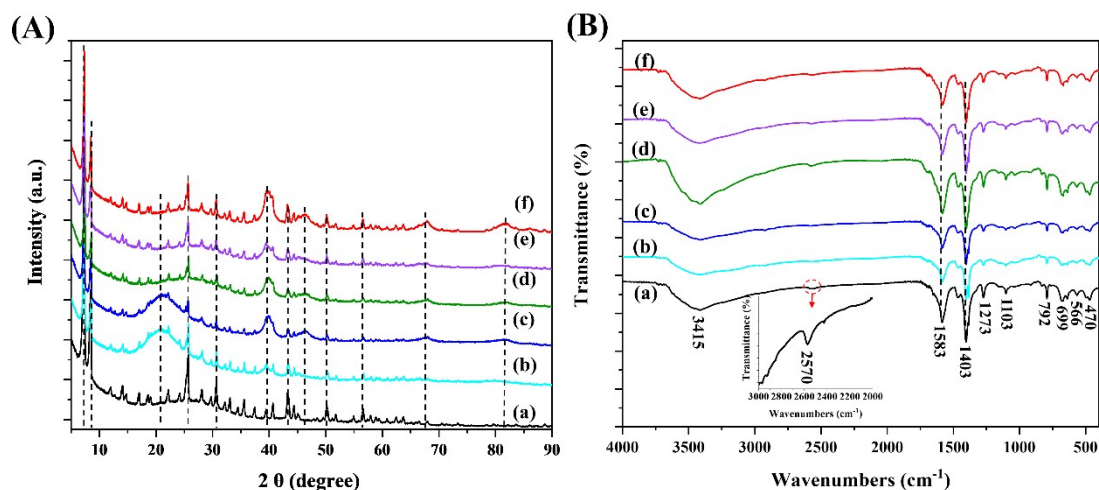

97

98 Fig. S1 XRD patterns (A) and FT-IR spectra (B) of UiO-66-(SH)<sub>2</sub> and UiO-66-  
 99 (SH)<sub>2</sub>@Pd<sub>m</sub>Pt<sub>n</sub> (m : n = 1 : 0, 2 : 1, 1 : 1, 1 : 2 and 0 : 1). (a) UiO-66-(SH)<sub>2</sub>; (b) UiO-66-  
 100 (SH)<sub>2</sub>@Pd; (c)UiO-66-(SH)<sub>2</sub>@Pt; (d)UiO-66-(SH)<sub>2</sub>@Pd<sub>1</sub>Pt<sub>2</sub>; (e)UiO-66-  
 101 (SH)<sub>2</sub>@Pd<sub>1</sub>Pt<sub>1</sub>; (f)UiO-66-(SH)<sub>2</sub>@Pd<sub>2</sub>Pt<sub>1</sub>.

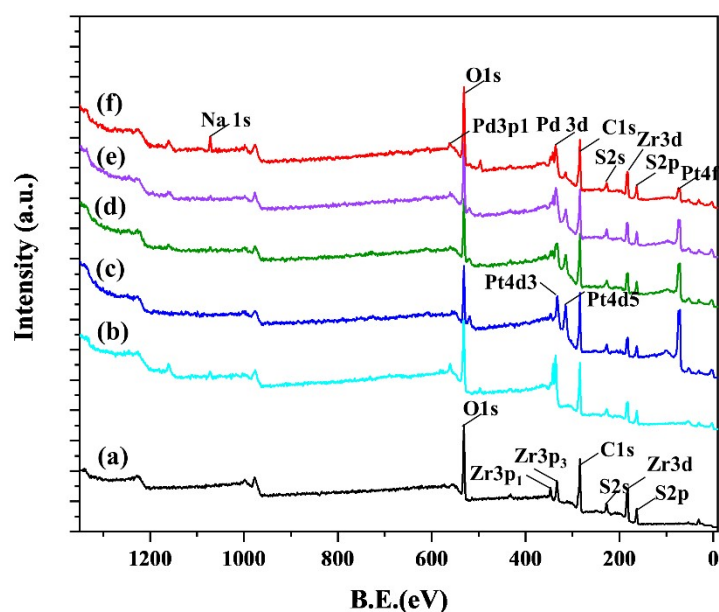

102

103 Fig. S2 XPS spectra of UiO-66-(SH)<sub>2</sub> and UiO-66-(SH)<sub>2</sub>@Pd<sub>m</sub>Pt<sub>n</sub> (m : n = 1 : 0, 2 : 1,  
 104 1 : 1, 1 : 2 and 0 : 1) (a) UiO-66-(SH)<sub>2</sub>; (b) UiO-66-(SH)<sub>2</sub>@Pd; (c)UiO-66-(SH)<sub>2</sub>@Pt;  
 105 (d)UiO-66-(SH)<sub>2</sub>@Pd<sub>1</sub>Pt<sub>2</sub>; (e)UiO-66-(SH)<sub>2</sub>@Pd<sub>1</sub>Pt<sub>1</sub>; (f)UiO-66-(SH)<sub>2</sub>@Pd<sub>2</sub>Pt<sub>1</sub>.

106

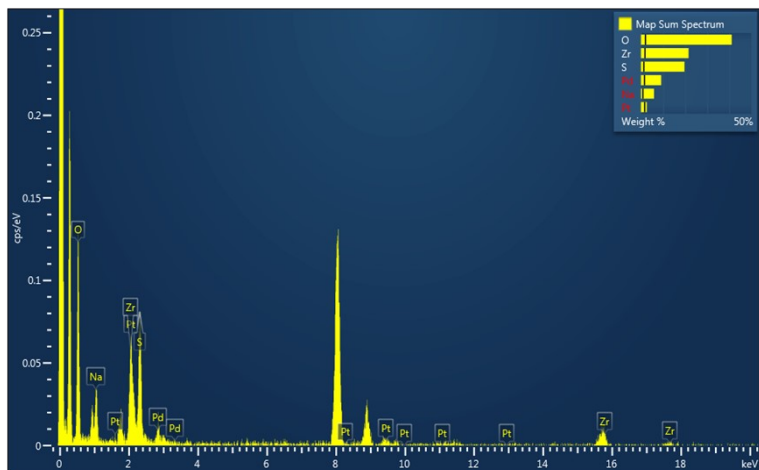

107

108 Fig. S3 Energy dispersive X-ray analysis of UiO-66-(SH)<sub>2</sub>@Pd<sub>2</sub>Pt<sub>1</sub>.

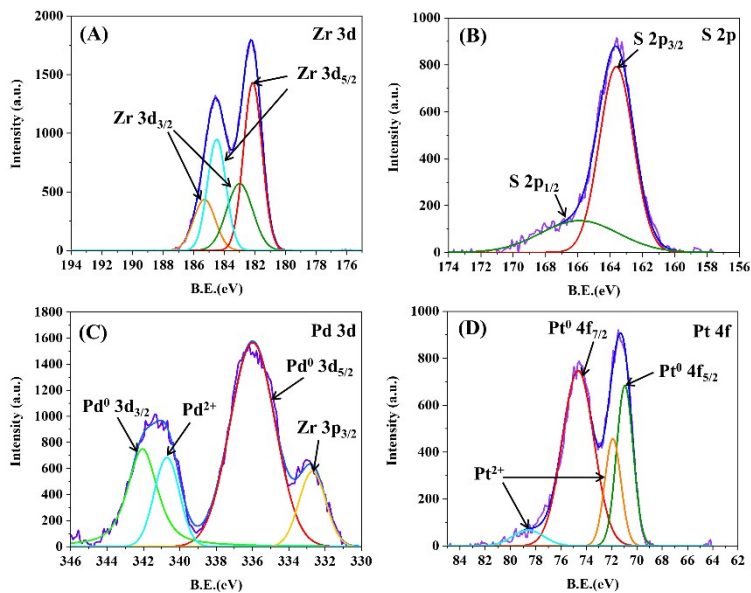

109

110 Fig. S4 High resolution XPS spectra of UiO-66-(SH)<sub>2</sub>@Pd<sub>2</sub>Pt<sub>1</sub>: (A) Zr 3d; (B) S 2p; (C)

111 Pd 3d; (D) Pt 4f

112

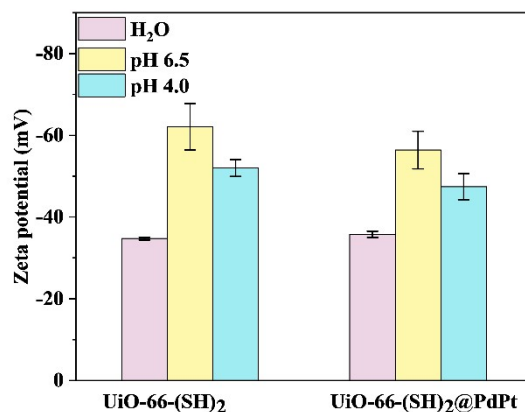

113

114 Fig. S5 Zeta potentials of UiO-66-(SH)<sub>2</sub> and UiO-66-(SH)<sub>2</sub>@PdPt under different  
 115 conditions: H<sub>2</sub>O, PBS (20 mM, pH = 6.5 and pH = 4.0).

### 116 S3. Experimental condition optimization for TMB oxidation

117 Similar to NEs, the enzymatic activity of NZs depends on the reaction time, pH,  
 118 nanozyme concentration ([NZ]), and temperature. As shown in **Fig. S6 A**, the  
 119 absorbance gradually increased with increasing reaction time and then leveled off after  
 120 15 min. The increasing relationship between absorbance and time was close to linear  
 121 correlation within 5 min. The POD-like activity was also influenced by the reaction  
 122 temperature (**Fig. S6 B**). The catalytic activity of the NZ gradually increased in the  
 123 range of 25–60 °C, exhibiting the highest catalytic activity (100%) up to 60 °C. It  
 124 suggested that the NZ has good thermal stability. In the range of 60–90 °C, the catalytic  
 125 activity of the NZ sharply decreased to 13.0%. The catalytic activity was maintained at  
 126 61.9% at room temperature (25°C) relative to the optimum activity. To facilitate the  
 127 operation, subsequent experiments were carried out at room temperature. Besides, the  
 128 catalytic activity of the NZ was also affected by the NZ concentration ([NZ]). As shown  
 129 in **Fig. S6 C**, the catalytic activity increased gradually in the [NZ] range of 1–50 μg·mL<sup>-1</sup>.  
 130 However, as the [NZ] increased, the native color of the NZ caused interference with

131 the oxidative color development of TMB. Since the catalytic activity of UiO-66-  
132 (SH)<sub>2</sub>@PdPt remained at 80.0% at a concentration of 25 μg·mL<sup>-1</sup>, and the interference  
133 of the background color on the color development reaction was almost negligible at this  
134 concentration. Therefore, the [NZ] was fixed at 25 μg·mL<sup>-1</sup> in the subsequent reaction.  
135 The POD-like activity of the NZ was studied in the pH range from 2.5 to 8.0 (**Fig.S6**  
136 **D**), and the results showed that the NZ displayed the best catalytic activity at pH = 4.0.  
137 The catalytic activity remained at 70.0 % at near-neutral condition of pH = 6.5, while  
138 it decreased to 22.1 % at the weakly basic conditions of pH = 8.0. Further, the oxidase-  
139 like activity of UiO-66-(SH)<sub>2</sub>@PdPt was also studied in the same pH range. The results  
140 showed that the oxidase-like activity exhibited optimal activity only in the moderately  
141 acidic pH range (2.5–5.0), while at pH ≥ 6.5, the oxidative activity decreased to below  
142 5% which was almost negligible(**Fig.S6 E**). Therefore, to eliminate the interference of  
143 intrinsic oxidase-like activity, subsequent studies of POD-like activity were performed  
144 in a near-neutral (pH = 6.5) PBS buffered (20 mM) system.

145

146

147



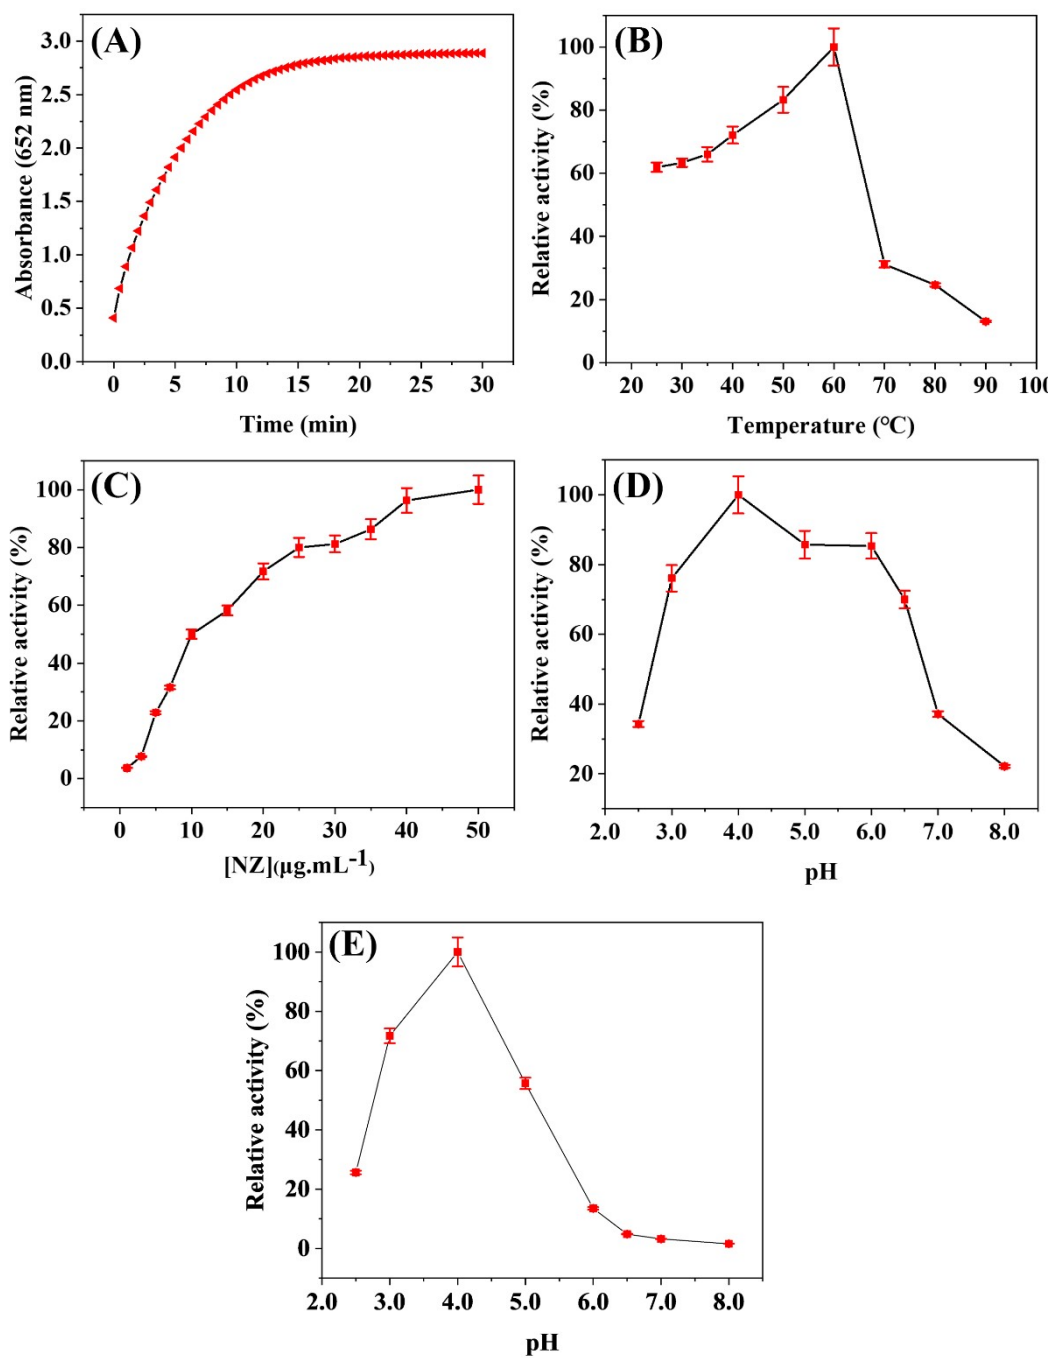

148

149 Fig. S6 Dependence of UiO-66-(SH)<sub>2</sub>@PdPt + H<sub>2</sub>O<sub>2</sub> + TMB oxidation system on

150 reaction time (A); temperature (B); nanozyme concentration([NZ]) (C) and pH (D), and

151 dependence of UiO-66-(SH)<sub>2</sub>@PdPt + TMB oxidation system on reaction pH (E).

152 (error bar was obtained from three parallel experimental values).

153

154

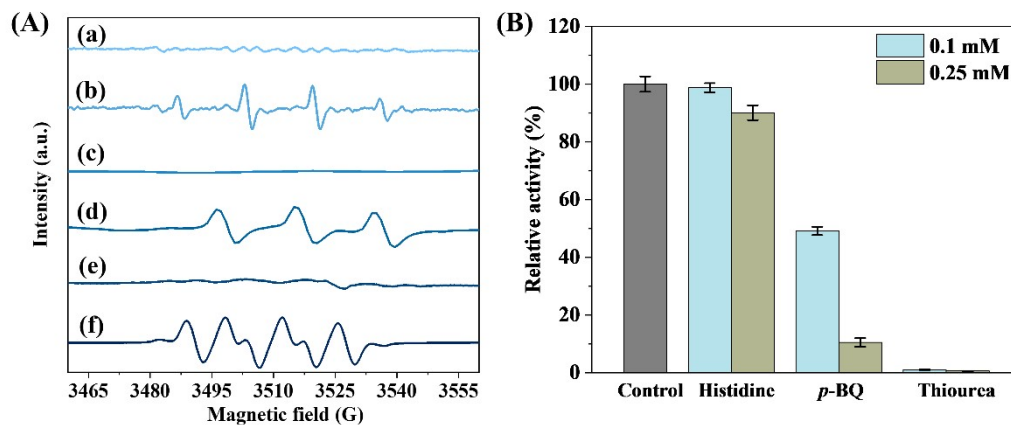

155

156 Fig. S7 (A) EPR spectra of UiO-66-(SH)<sub>2</sub>@Pd<sub>2</sub>Pt<sub>1</sub> for •OH, <sup>1</sup>O<sub>2</sub>, O<sub>2</sub><sup>•-</sup> and their blank  
 157 controls: (a) DMPO + H<sub>2</sub>O<sub>2</sub> + PBS; (b) DMPO + H<sub>2</sub>O<sub>2</sub> + NZ + PBS; (c) TEMP+ H<sub>2</sub>O<sub>2</sub>  
 158 + PBS; (d) TEMP+ H<sub>2</sub>O<sub>2</sub>+ NZ + PBS; (e) DMPO+ H<sub>2</sub>O<sub>2</sub> + methanol; (f) DMPO +  
 159 H<sub>2</sub>O<sub>2</sub> + NZ + methanol. Reaction conditions: NZ (75 μg/mL), H<sub>2</sub>O<sub>2</sub> (1 mM), PBS (pH  
 160 = 6.5, 20 mM), room temperature, 5-10 min. (B) Effects of ROS radical scavengers  
 161 (Histidine, *p*-BQ and Thiourea) on TMB-H<sub>2</sub>O<sub>2</sub>-UiO-66-(SH)<sub>2</sub>@PdPt reaction system  
 162 at pH = 6.5 (error bars were obtained based on three parallel experiments). Reaction  
 163 conditions: 865 μL PBS (pH = 6.5, 20 mM), 20 μL radical scavenger (0, 5, or 12.5  
 164 mM), 50 μL H<sub>2</sub>O<sub>2</sub> (20 mM), 40 μL TMB (15 mM), 25 μL UiO-66-(SH)<sub>2</sub>@PdPt (1  
 165 mg/mL), 25°C, 5 min.

166 **S4. Experimental condition optimization for the oxidative coupling reaction of 2-**  
 167 **CP and 4-AAP**

168 Interestingly, unlike TMB as a substrate, the optimal reaction pH for UiO-66-  
 169 (SH)<sub>2</sub>@PdPt catalyzed oxidation reaction with 2-CP and 4-AAP as substrates was 6.5  
 170 while that of the former was 4.0 (Fig. S8 A). This difference may be the consequence  
 171 of two factors: on the one hand, differences in substrates may lead to changes in reaction  
 172 conditions. The physicochemical properties of 2-CP and TMB differ significantly, e.g.,

173 the  $pK_a$  value of 2-CP ranges from 8.3 to 8.6, whereas the  $pK_a$  value of TMB is 4.49<sup>1</sup>,  
174 <sup>2</sup>; On the other hand, the color development reaction was also influenced by the  
175 coupling step of the quinone product with 4-AAP. Near-neutral conditions favor the  
176 stable presence of the quinoneimine structure. The optimal concentration of 4-AAP was  
177 determined as 1 mg·mL<sup>-1</sup> (**Fig. S8 B**). The reaction activity increased as the H<sub>2</sub>O<sub>2</sub>  
178 concentration increased and reached saturation after 20 mM, thus this concentration  
179 was determined to be the optimal concentration of H<sub>2</sub>O<sub>2</sub> (**Fig. S8 C**). Considering the  
180 background interference, convenience and time cost of the assay, the reaction was  
181 carried out at room temperature with a reaction time of less than 30 min and the  
182 concentration of NZ was kept at 25 µg·mL<sup>-1</sup> (**Figs. S8 D and E**).

183

184

185

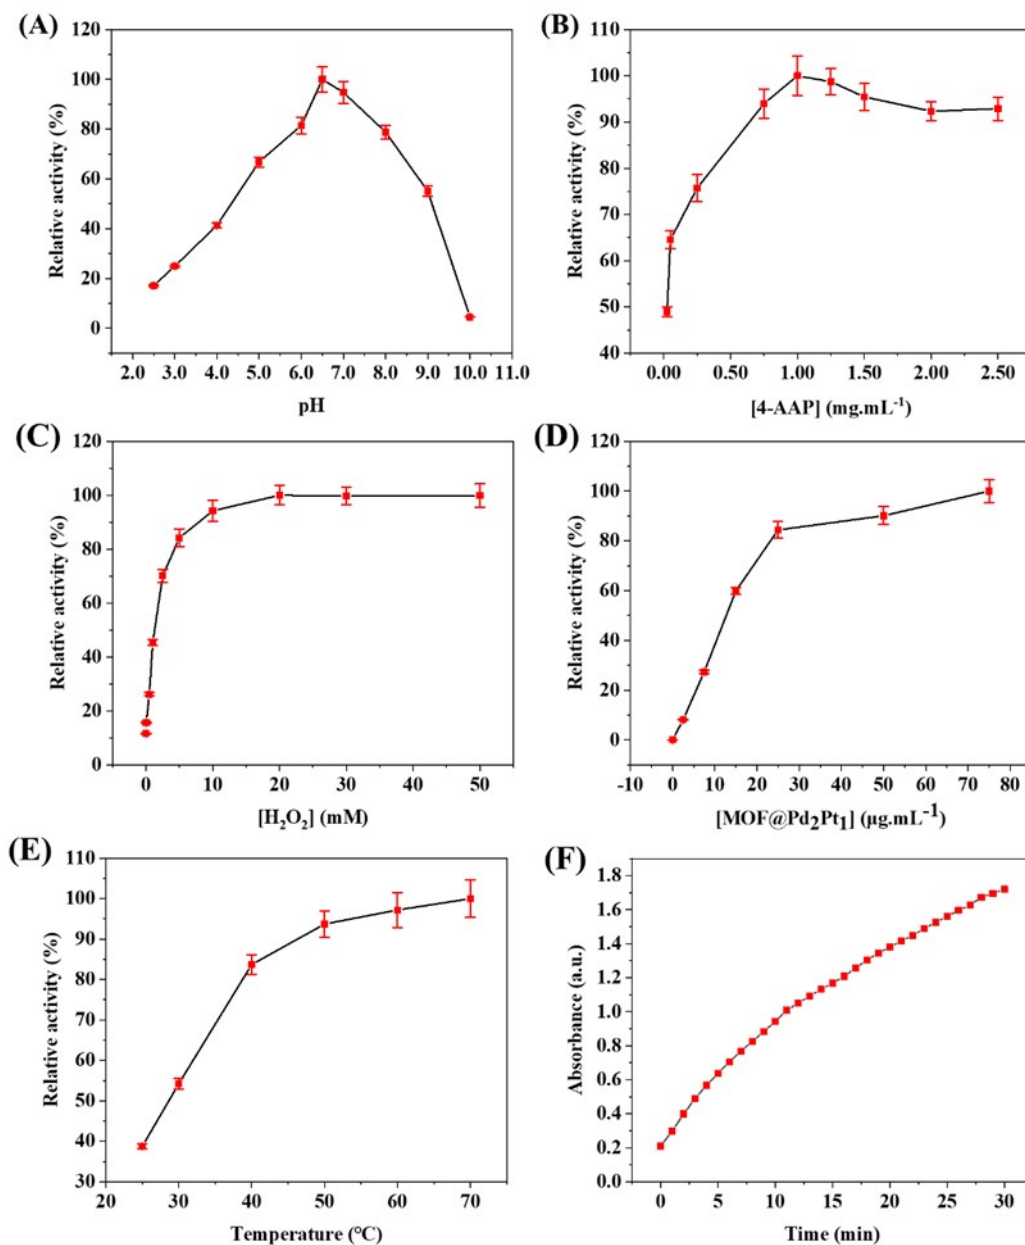

186

187 Fig. S8 Dependence of UiO-66-(SH)<sub>2</sub>@PdPt + H<sub>2</sub>O<sub>2</sub> + 4-AAP + 2-CP system on pH

188 (A); 4-AAP concentration (B); H<sub>2</sub>O<sub>2</sub> concentration (C); nanozyme concentration (D);

189 temperature (E) and reaction time (F).

190

191

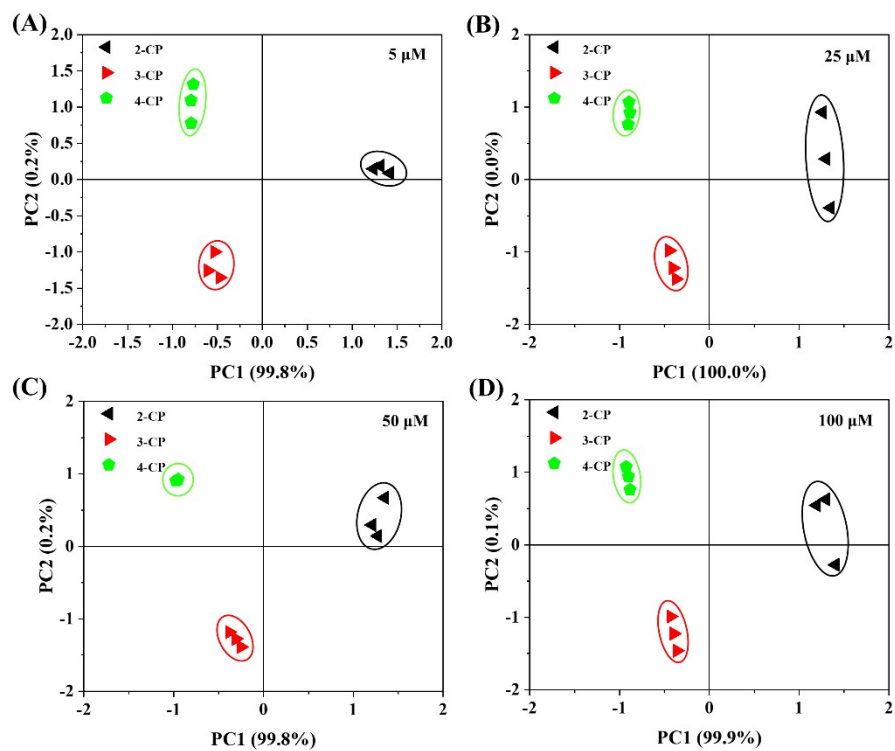

192

193 Fig. S9 PCA score maps of response modes for three CP isomers of 5  $\mu\text{M}$  (A), 25  $\mu\text{M}$

194 (B), 50  $\mu\text{M}$  (C) and 100  $\mu\text{M}$  (D).

195

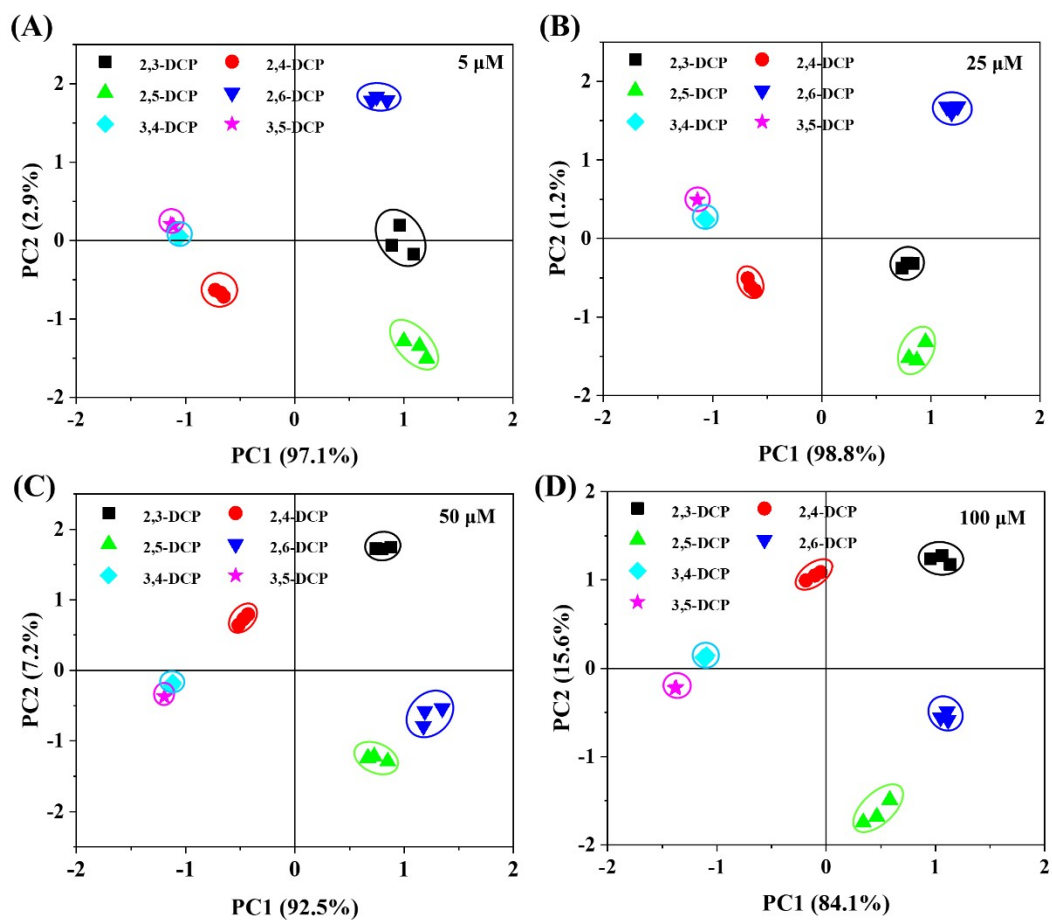

196

197 Fig. S10 PCA score maps of response modes for six DCP isomers of 5  $\mu\text{M}$  (A), 25  $\mu\text{M}$

198 (B), 50  $\mu\text{M}$  (C) and 100  $\mu\text{M}$  (D).

199

200

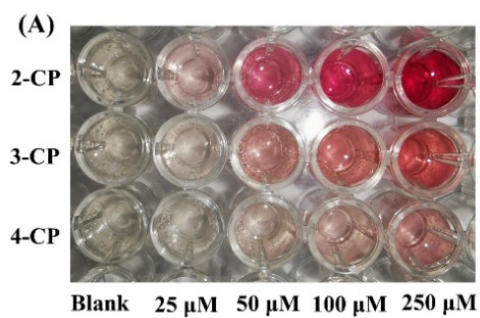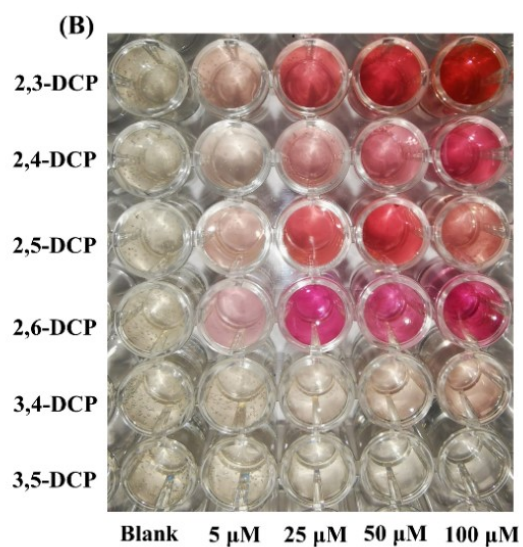

201

202 Fig. S11 Color response of UiO-66-(SH)<sub>2</sub>@PdPt + H<sub>2</sub>O<sub>2</sub> + 4-AAP system in the

203 presence of CPs (A) and DCPs (B) at different concentrations.

204

205

206

207

208

209

210

211

212

213

214 Table S1 Kinetic parameters of catalytic reaction between different nanozymes and  
 215 HRP.

| Catalyst                                                                                         | $K_m$ (Mm) |                               | $V_{max}$ ( $\times 10^{-8}$ M·s <sup>-1</sup> ) |                               | Ref.         |
|--------------------------------------------------------------------------------------------------|------------|-------------------------------|--------------------------------------------------|-------------------------------|--------------|
|                                                                                                  | TMB        | H <sub>2</sub> O <sub>2</sub> | TMB                                              | H <sub>2</sub> O <sub>2</sub> |              |
| HRP                                                                                              | 0.434      | 3.70                          | 10.0                                             | 8.71                          | 3            |
| Fe <sub>3</sub> O <sub>4</sub> MNPs                                                              | 0.098      | 154                           | 3.44                                             | 9.78                          | 3            |
| 2D Pd@Pt                                                                                         | 0.0865     | 2.231                         | 6.228                                            | 5                             | 4            |
| Dap-Pd <sub>0.25</sub> NPs                                                                       | 0.4        | 2.636                         | 4.61                                             | 1.837                         | 5            |
| GeO <sub>2</sub>                                                                                 | 0.420      | 1.75                          | 23.397                                           | 23.400                        | 6            |
| Ru@G                                                                                             | 0.027      | 5.8                           | 163                                              | 13.7                          | 7            |
| Cu/Au/Pt TNPs                                                                                    | 0.15       | 2.34                          | 7.33                                             | 136.5                         | 8            |
| Graphene-Au NPs                                                                                  | 0.38       | 26.4                          | 18.30                                            | 15.41                         | 9            |
| Pt <sub>200</sub> -JP                                                                            | 0.719      | 9.344                         | 51.33                                            | 12.49                         | 10           |
| NAC-Pt <sub>8</sub>                                                                              | 0.132      | 35.00                         | 48.15                                            | 31.23                         | 11           |
| Pt NP                                                                                            | 0.127      | 1.14                          | 2                                                | 3.1                           | 12           |
| Pd-Ir cubes                                                                                      | 0.13       | 0.034                         | 6.5                                              | 5.1                           | 13           |
| Fe <sub>3</sub> O <sub>4</sub> @SiO <sub>2</sub> -NH <sub>2</sub> -<br>Au@Pd <sub>0.30</sub> NPs | 0.090      | 3.50                          | 11.20                                            | 6.76                          | 14           |
| MSN-AuNPs                                                                                        | 0.0411     | 15.81                         | 12.66                                            | 17.30                         | 15           |
| UiO-66-(SH) <sub>2</sub> @PdPt                                                                   | 0.068      | 1.25                          | 15.51                                            | 20.28                         | This<br>work |

216

217

218

219

220

221



222 Table S2 The performance of the nanozyme for glucose colorimetric detection.

| Nanozyme                                                        | Linear range<br>( $\mu\text{M}$ ) | LOD ( $\mu\text{M}$ ) | pH   | Ref.      |
|-----------------------------------------------------------------|-----------------------------------|-----------------------|------|-----------|
| WS <sub>2</sub>                                                 | 5–300                             | 2.9                   | 6.9  | 16        |
| CuS                                                             | 25–600                            | 4.9                   | 7    | 17        |
| FeCPNPs                                                         | 2–20                              | 1                     | 7    | 18        |
| Hep-Pt                                                          | 100–2000                          | 33                    | 6.0  | 19        |
| MoSe <sub>2</sub> nanosheets                                    | 40–400                            | 28                    | 7.0  | 20        |
| SO <sub>4</sub> <sup>2-</sup> /CoFe <sub>2</sub> O <sub>4</sub> | 0–300                             | 6.4                   | 7.0  | 21        |
| Cu <sub>0.89</sub> Zn <sub>0.11</sub> O                         | 25–500                            | 1.5                   | 4.65 | 22        |
| WSe <sub>2</sub> nanosheets                                     | 10–60                             | 10                    | 3.5  | 23        |
| CeO <sub>2</sub> /Y                                             | 0–340                             | 35.4                  | 3.6  | 24        |
| MoS <sub>2</sub> NPs                                            | 15–135                            | 7                     | 3.5  | 25        |
| H <sub>2</sub> TCPP-Fe <sub>3</sub> O <sub>4</sub>              | 5–25                              | 2.21                  | 3.8  | 26        |
| Pt-CMP                                                          | 5–100                             | 0.12                  | 4.0  | 27        |
| Por-Ceria                                                       | 40–150                            | 19                    | 3.8  | 28        |
| GK-Pd NPs                                                       | 10–1000                           | 6                     | 4.0  | 29        |
| Fe <sub>3</sub> O <sub>4</sub> MNPs                             | 50–1000                           | 30                    | 4.0  | 30        |
| UiO-66-(SH) <sub>2</sub> @PdPt                                  | 5–700                             | 2.7                   | 6.5  | This work |

223

224

225

226

227

228 Table S3 Determination of D-glucose concentration in human serum.

| Human serum | Proposed method | Glucometer | Relative |
|-------------|-----------------|------------|----------|
|-------------|-----------------|------------|----------|

| sample   | (mM , n=3)   | ( mM ) | error ( %) |
|----------|--------------|--------|------------|
| Sample 1 | 4.04 ± 0.08  | 4.1    | -1.46      |
| Sample 2 | 5.99 ± 0.33  | 6.2    | -3.39      |
| Sample 3 | 7.62 ± 0.20  | 7.8    | -2.31      |
| Sample 4 | 11.71 ± 0.23 | 11.9   | -1.60      |
| Sample 5 | 15.47 ± 0.10 | 15.6   | -0.83      |

229

230 Table S4 The performance of different methods for the detection of 2-CP or 2,4- DCP.

| Material                                                                          | Method          | Analyte     | Linear range<br>( $\mu\text{M}$ ) | LOD<br>( $\mu\text{M}$ ) | Ref.         |
|-----------------------------------------------------------------------------------|-----------------|-------------|-----------------------------------|--------------------------|--------------|
| Fe <sub>3</sub> O <sub>4</sub> NPs                                                | Chromatographic | 2-CP        | 0.5 – 50                          | 0.15                     | 31           |
| Fe <sub>3</sub> O <sub>4</sub> @MnO <sub>x</sub>                                  | Colorimetric    | 2-CP        | 0.1 – 10 ,<br>10 – 1600           | 0.85                     | 32           |
| CNT-PPy-HRP                                                                       | Electrochemical | 2-CP        | 1.6 – 8.0                         | 0.26                     | 33           |
| Poly(GMA-co-MTM)/PPy/CNT                                                          | Electrochemical | 2-CP        | 1.6 – 68.8                        | 0.249                    | 34           |
| g-C <sub>3</sub> N <sub>4</sub> /CDs/GCE                                          | Electrochemical | 2-CP        | 0.5 – 10                          | 1.50                     | 35           |
| Cu-BTC/GO                                                                         | Electrochemical | 2,4-<br>DCP | 1.5 – 24                          | 0.083                    | 36           |
| [Cu(bpy)(H <sub>2</sub> O) <sub>2</sub><br>(BF <sub>4</sub> ) <sub>2</sub> (bpy)] | Electrochemical | 2,4-<br>DCP | 4 – 100                           | 1.1                      | 37           |
| Fe <sub>1</sub> @CN-20                                                            | Colorimetric    | 2,4-<br>DCP | 30 – 184                          | 1.3                      | 38           |
| UiO-66-(SH) <sub>2</sub> @PdPt                                                    | Colorimetric    | 2-CP        | 0.5 – 200                         | 0.24                     | This<br>work |
| UiO-66-(SH) <sub>2</sub> @PdPt                                                    | Colorimetric    | 2,4-<br>DCP | 0.5 – 200                         | 0.41                     | This<br>work |

231 Table S5 Determination of 2-CP and 2,4- DCP in spiked samples.

| Spiked | Concentration ( $\mu\text{M}$ ) | Found ( $\mu\text{M}$ ) | RSD(% , n=3) | Recovery(%) |
|--------|---------------------------------|-------------------------|--------------|-------------|
|--------|---------------------------------|-------------------------|--------------|-------------|

|         |     |              |      |       |
|---------|-----|--------------|------|-------|
|         | 25  | 25.76 ± 0.67 | 2.6  | 103.0 |
| 2-CP    | 50  | 51.67 ± 2.17 | 4.2  | 103.3 |
|         | 100 | 93.32 ± 2.89 | 3.1  | 93.3  |
|         | 25  | 24.22 ± 0.56 | 2.3  | 96.9  |
| 2,4-DCP | 50  | 44.45 ± 0.42 | 0.96 | 88.9  |
|         |     | 112.21 ±     |      |       |
|         | 100 | 5.66         | 5.1  | 112.2 |

232

### 233 Reference

- 234 1. K. C. Yang, Y. X. Zhao, M. Ji, Z. L. Li, S. Y. Zhai, X. Zhou, Q. Wang, C. Wang and  
235 B. Liang, *Water Res.*, 2021, **193**.
- 236 2. Z. N. Garba, W. M. Zhou, I. Lawan, W. Xiao, M. X. Zhang, L. W. Wang, L. H. Chen  
237 and Z. H. Yuan, *J. Environ. Manage.*, 2019, **241**, 59-75.
- 238 3. L. Z. Gao, J. Zhuang, L. Nie, J. B. Zhang, Y. Zhang, N. Gu, T. H. Wang, J. Feng, D.  
239 L. Yang, S. Perrett and X. Yan, *Nat. Nanotechnol.*, 2007, **2**, 577-583.
- 240 4. J. P. Wei, X. L. Chen, S. G. Shi, S. G. Mo and N. F. Zheng, *Nanoscale*, 2015, **7**,  
241 19018-19026.
- 242 5. Y. Liang, H. C. Li, L. Y. Fan, R. Y. Li, Y. S. Cui, X. B. Ji, H. Y. Xiao, J. Hu and L.  
243 G. Wang, *Colloid. Surface. A*, 2022, **633**.
- 244 6. X. Liang and L. Han, *Adv. Funct. Mater.*, 2020, **30**.
- 245 7. P. Keoingthong, Q. Hao, S. K. Li, L. Zhang, J. Q. Xu, S. Wang, L. Chen, W. H. Tan  
246 and Z. Chen, *Chem. Commun.*, 2021, **57**, 7669-7672.
- 247 8. P. Wu, P. Ding, X. S. Ye, L. Li, X. X. He and K. M. Wang, *RSC Adv.*, 2019, **9**,  
248 14982-14989.
- 249 9. X. M. Chen, X. T. Tian, B. Y. Su, Z. Y. Huang, X. Chen and M. Oyama, *Dalton T.*,  
250 2014, **43**, 7449-7454.
- 251 10. X. L. Guo, Y. X. Suo, X. Zhang, Y. S. Cui, S. F. Chen, H. T. Sun, D. W. Gao, Z.  
252 W. Liu and L. G. Wang, *Analyst*, 2019, **144**, 5179-5185.
- 253 11. X. X. Li, Q. W. Huang, W. Li, J. L. Zhang and Y. Fu, *J Anal Test*, 2019, **3**, 277-  
254 285.
- 255 12. A. J. Kora and L. Rastogi, *Sens. Actuat B-Chem.*, 2018, **254**, 690-700.

- 256 13. X. H. Xia, J. T. Zhang, N. Lu, M. J. Kim, K. Ghale, Y. Xu, E. McKenzie, J. B. Liu  
257 and H. H. Yet, *Acs Nano*, 2015, **9**, 9994-10004.
- 258 14. O. Adeniyi, S. Sicwetsha and P. Mashazi, *Acs Appl. Mater. Inter.*, 2020, **12**, 1973-  
259 1987.
- 260 15. Y. Tao, E. G. Ju, J. S. Ren and X. G. Qu, *Adv. Mater.*, 2015, **27**, 1097-1104.
- 261 16. T. R. Lin, L. S. Zhong, Z. P. Song, L. Q. Guo, H. Y. Wu, Q. Q. Guo, Y. Chen, F.  
262 F. Fu and G. N. Chen, *Biosens. Bioelectron.*, 2014, **62**, 302-307.
- 263 17. X. H. Niu, X. C. Xu, X. Li, J. M. Pan, F. X. Qiu, H. L. Zhao and M. B. Lan, *Chem.*  
264 *Commun.*, 2018, **54**, 13443-13446.
- 265 18. J. Q. Tian, S. Liu, Y. L. Luo and X. P. Sun, *Catal. Sci. Technol.*, 2012, **2**, 432-436.
- 266 19. H. Z. Gu, Q. W. Huang, J. L. Zhang, W. Li and Y. Fu, *Colloid. Surface. A*, 2020,  
267 **606**.
- 268 20. G. Y. Jiang, T. R. Lin, Y. X. Qin, X. H. Zhang, L. Hou, Y. Sun, J. J. Huang, S. D.  
269 Liu and S. L. Zhao, *Chem. Commun.*, 2020, **56**, 10847-10850.
- 270 21. X. L. Yin, P. Liu, X. C. Xu, J. M. Pan, X. Li and X. H. Niu, *Sens. Actuat B-Chem.*,  
271 2021, **328**.
- 272 22. A. P. Nagvenkar and A. Gedanken, *Acs Appl. Mater. Inter.*, 2016, **8**, 22301-22308.
- 273 23. T. M. Chen, X. J. Wu, J. X. Wang and G. W. Yang, *Nanoscale*, 2017, **9**, 11806-  
274 11813.
- 275 24. X. W. Cheng, L. Huang, X. Y. Yang, A. A. Elzatahry, A. Alghamdi and Y. H. Deng,  
276 *J. Colloid. Interf. Sci.*, 2019, **535**, 425-435.
- 277 25. Y. H. Zhao, Y. Huang, J. L. Wu, X. L. Zhan, Y. Y. Xie, D. Y. Tang, H. Y. Cao and  
278 W. Yun, *RSC Adv.*, 2018, **8**, 7252-7259.
- 279 26. Q. Y. Liu, H. Li, Q. R. Zhao, R. R. Zhu, Y. T. Yang, Q. Y. Jia, B. Bian and L. H.  
280 Zhuo, *Mat. Sci. Eng. C-Mater.*, 2014, **41**, 142-151.
- 281 27. G. Q. Wang, L. S. Feng, W. Li, J. L. Zhang and Y. Fu, *Microchim. Acta*, 2019, **186**.
- 282 28. Q. Y. Liu, Y. T. Yang, X. T. Lv, Y. A. Ding, Y. Z. Zhang, J. J. Jing and C. X. Xu,  
283 *Sens. Actuat B-Chem.*, 2017, **240**, 726-734.
- 284 29. L. Rastogi, D. Karunasagar, R. B. Sashidhar and A. Giri, *Sens. Actuat B-Chem.*,  
285 2017, **240**, 1182-1188.

- 286 30. H. Wei and E. Wang, *Analytical Chemistry*, 2008, **80**, 2250-2254.
- 287 31. J. D. Li, X. L. Zhao, Y. L. Shi, Y. Q. Cai, S. F. Mou and G. B. Jiang, *J. Chromatogr.*  
288 *A*, 2008, **1180**, 24-31.
- 289 32. X. C. Xu, S. W. Wu, D. Z. Guo and X. H. Niu, *Anal. Chim. Acta*, 2020, **1107**, 203-  
290 212.
- 291 33. S. Korkut, B. Keskinler and E. Erhan, *Talanta*, 2008, **76**, 1147-1152.
- 292 34. S. K. Ozoner, F. Yilmaz, A. Celik, B. Keskinler and E. Erhan, *Curr. Appl. Phys.*,  
293 2011, **11**, 402-408.
- 294 35. T. H. G. Moundzounga, M. G. Peleyeju, S. O. Sanni, M. J. Klink, E. Oseghe, E.  
295 Viljoen and A. E. Ofomaja, *Int. J. Electrochem. Sci.*, 2021, **16**, 210560.
- 296 36. M. B. Nguyen, V. T. Hong Nhung, V. T. Thu, D. T. Ngoc Nga, T. N. Pham Truong,  
297 H. T. Giang, P. T. Hai Yen, P. H. Phong, T. A. Vu and V. T. Thu Ha, *RSC Adv.*,  
298 2020, **10**, 42212-42220.
- 299 37. M. Cui, J. Li, D. Lu and Z. Shao, *Int. J. Electrochem. Sci.*, 2018, **13**, 3420-3428.
- 300 38. Y. M. Lin, F. Wang, J. Yu, X. Zhang and G. P. Lu, *J. Hazard. Mater.*, 2022, **425**.
